# Supplementary material for: The Comparison of Predicting Factors and Outcomes of MINOCA and STEMI Patients in the 5-Year Follow-Up
Source: MDPI journal article supplement (doi:10.3390/jpm13050856), 2023-05-19
Supplement: s1 [file s1]

## Supplementary material

As supplementary material we present data for longer follow-up up to 31.12.2022 assessing all-cause death, cardiac death, and myocardial infarction rates (Table S1). Additionally, Figure S1 presents Kaplan-Meier curves for those endpoints.

Although numerically higher rates for assessed endpoints were observed in STEMI patients, no statistically significant differences were confirmed (Figure S1).

**Table S1. 9-year follow-up data**

|                                 | <b>MINOCA<br/>N = 112</b> | <b>STEMI<br/>N = 166</b> |
|---------------------------------|---------------------------|--------------------------|
| Lost to follow-up*              | 8 (7.1%)                  | 22 (13.3%)               |
| Median follow-up (IQR) [months] | 109.5 (96.8 – 129)        | 117 (97-139)             |
| min. – max. follow-up [months]  | 4 - 153                   | 10 - 153                 |
| All-cause death rate            | 20 (17.9%)                | 40 (24.1%)               |
| Cardiac death rate              | 11 (9.8%)                 | 28 (16.9%)               |
| Myocardial infarction rate      | 16 (14.3%)                | 35 (21.1%)               |

\*for first 60 months no lost to follow-up cases were reported. Lost to follow-up was observed for repeated longer observation > 60 months.

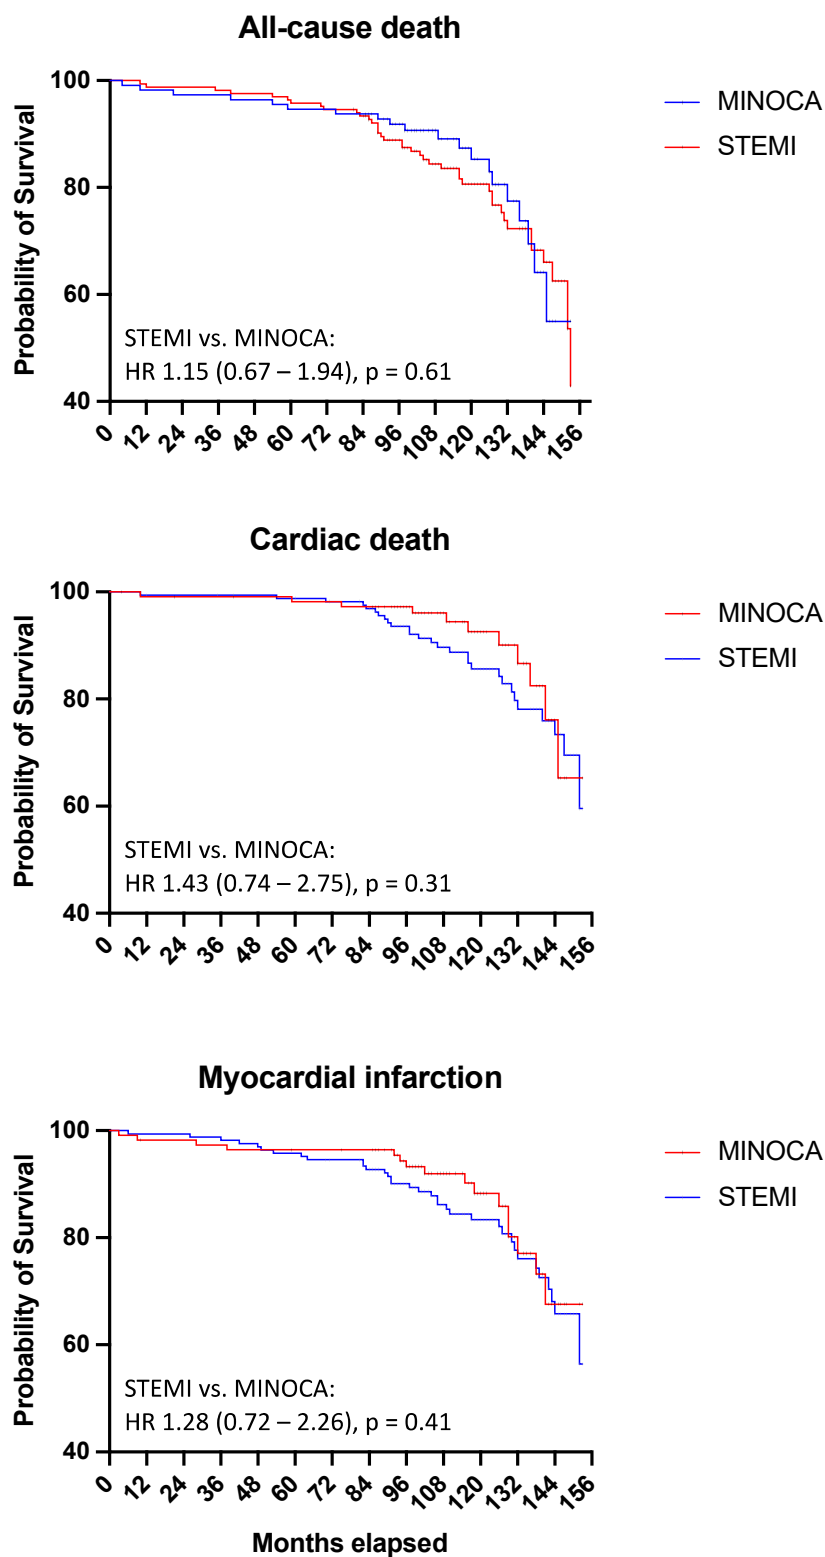

Numbers at risk

| Months | 0   | 12  | 24  | 36  | 48  | 60  | 72  | 84  | 96  | 108 | 120 | 132 | 144 |
|--------|-----|-----|-----|-----|-----|-----|-----|-----|-----|-----|-----|-----|-----|
| MINOCA | 112 | 110 | 109 | 109 | 108 | 106 | 98  | 97  | 95  | 85  | 59  | 41  | 27  |
| STEMI  | 166 | 165 | 165 | 164 | 162 | 159 | 135 | 133 | 126 | 120 | 101 | 71  | 46  |

**Figure S1. Kaplan-Meier curves on long-term outcomes (follow-up of median 9 years)**
